# Supplementary material for: Grapevine Green Pruning Residues as a Promising and Sustainable Source of Bioactive Phenolic Compounds
Source: PubMed Central journal article supplement (PMC7038121; doi:10.3390/molecules25030464), 2020-01-22
Supplement: molecules-25-00464-s001.pdf [file molecules-25-00464-s001.pdf]

## Supplementary materials

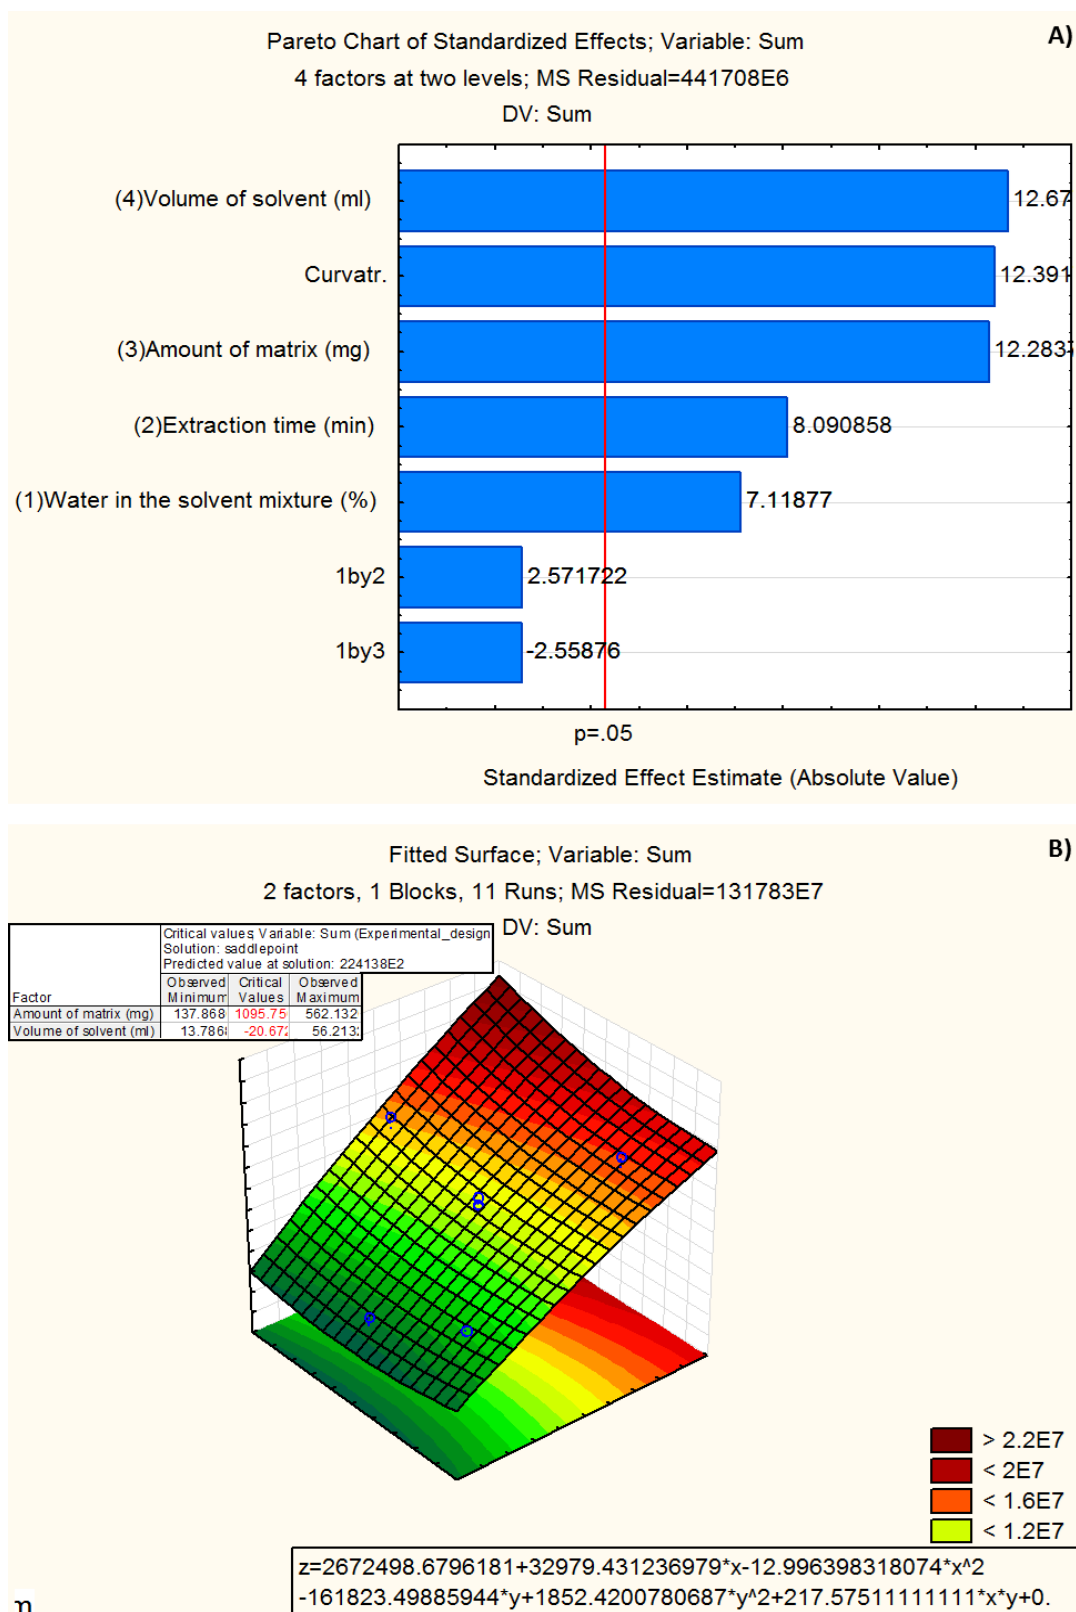

**Figure S1.** – Results of the optimization of extraction conditions obtained by experimental design: A) Pareto Chart of Effects relative to the sum of the peak areas of the HPLC-PDA chromatographic profiles of the extracts, obtained through the Box, Hunter & Hunter Design; B) Surface Response and

Critical Values relative to the sum of the peak areas of the HPLC-PDA chromatographic profiles of the extracts, obtained through the Central Composite Design.

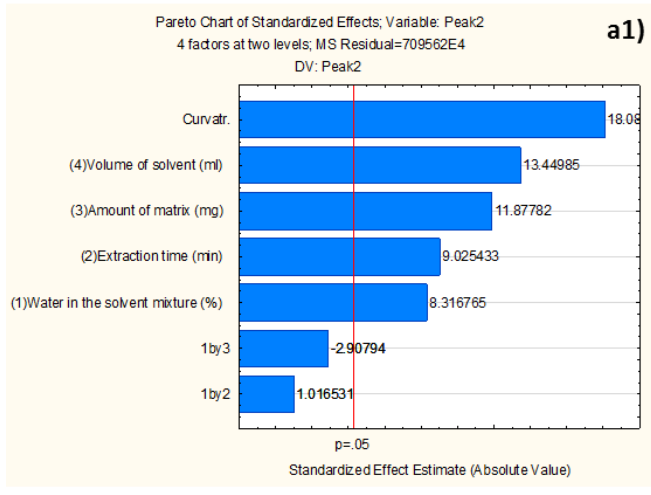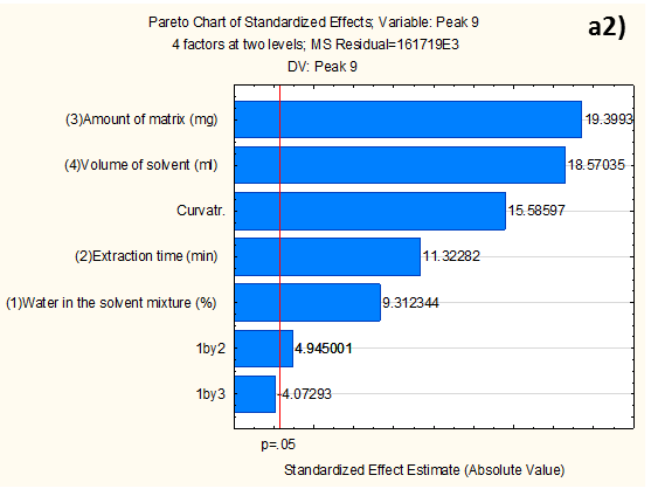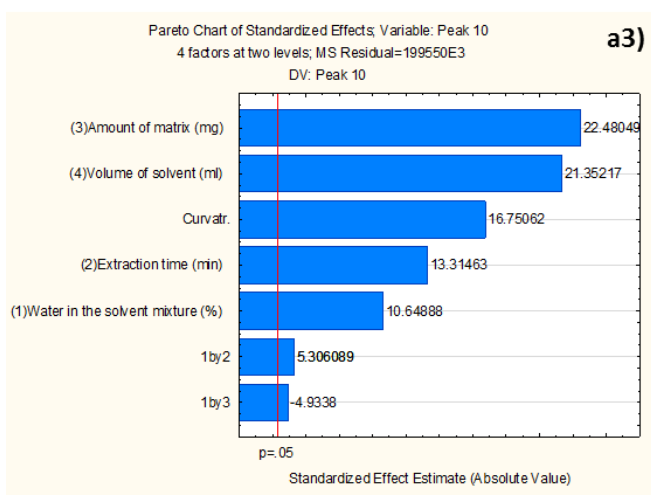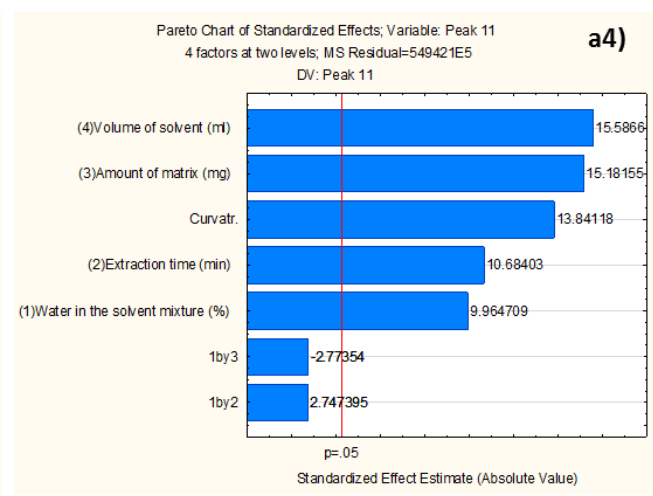

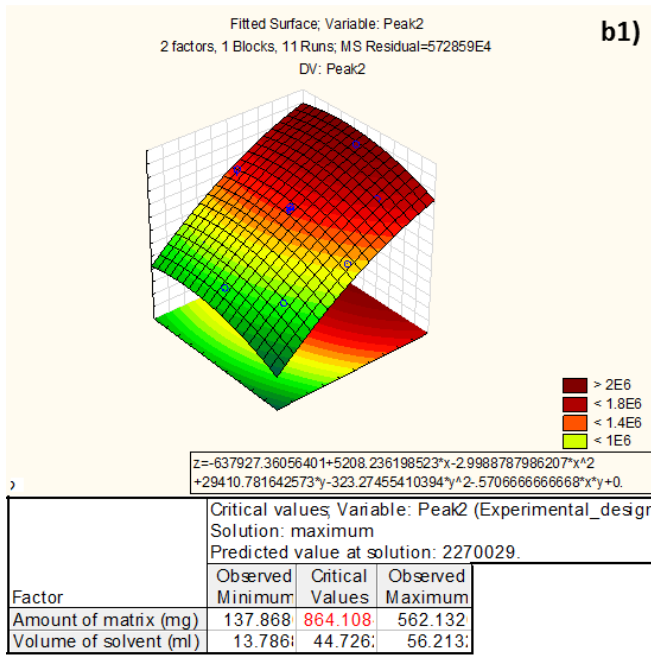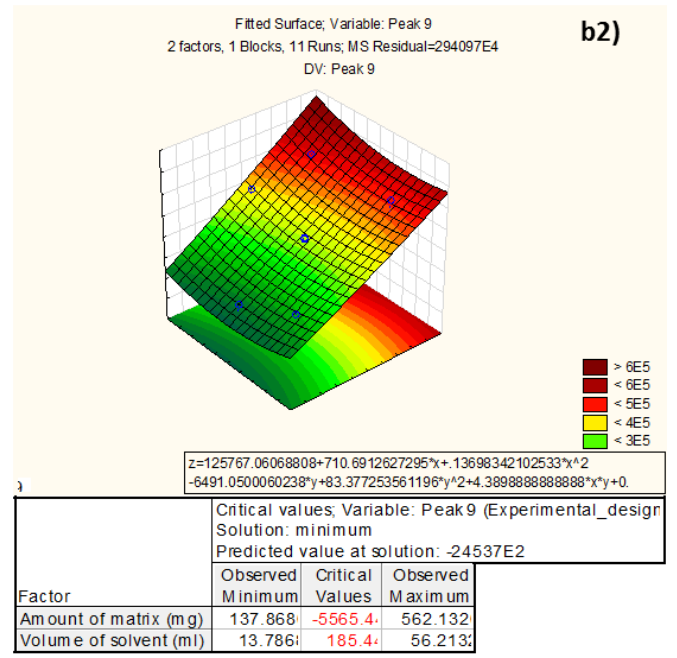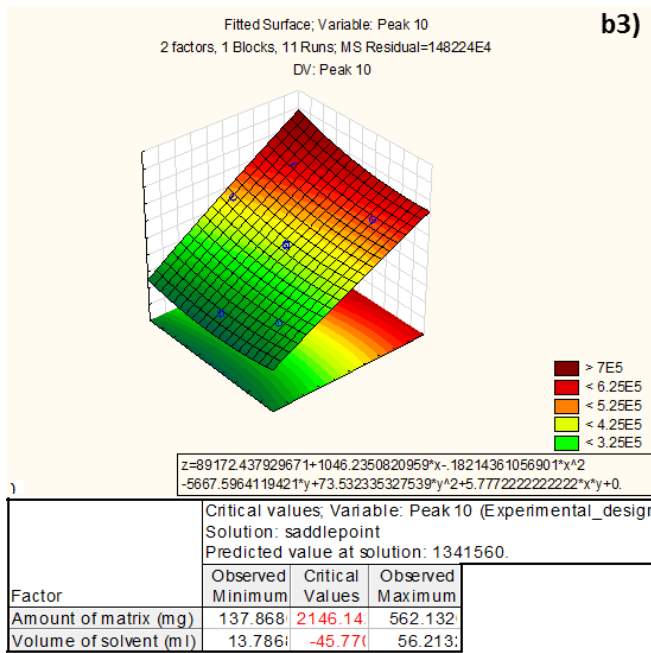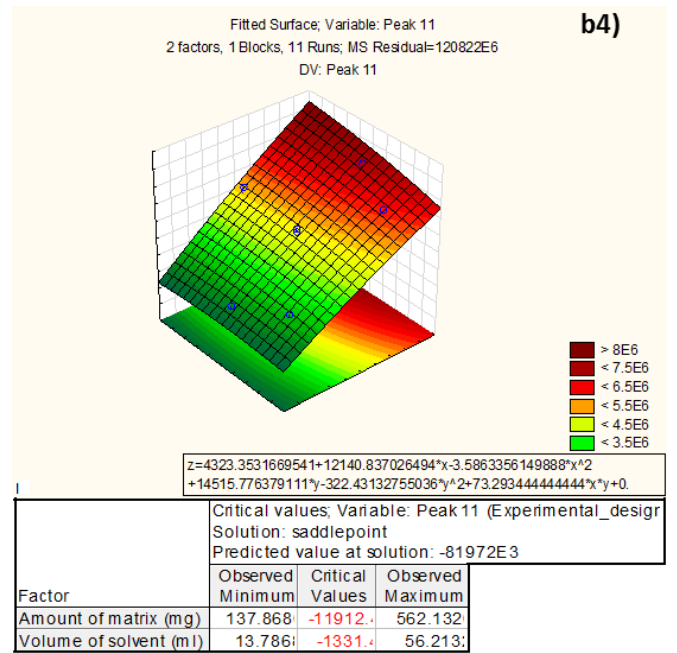

**Figure S2– Results of the optimization of the extraction conditions obtained by the experimental design.** Pareto Chart of Effects relative to the main components of the extracts obtained through the Box, Hunter & Hunter Design: a1) peak 2, a2) peak9, a3) peak 10, a4) peak 11. Surface Response and Critical Values relative to the main components of the extracts obtained through the Central Composite Design: b1) peak 2, b2) peak9, b3) peak 10, b4) peak 11.

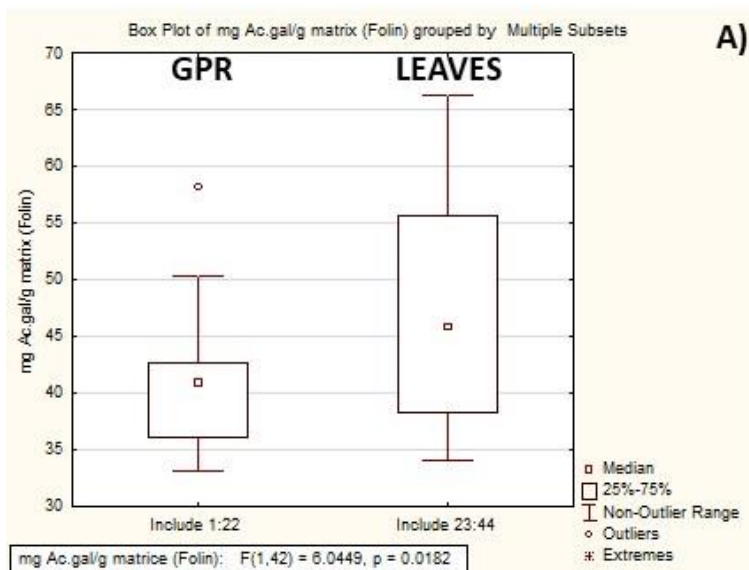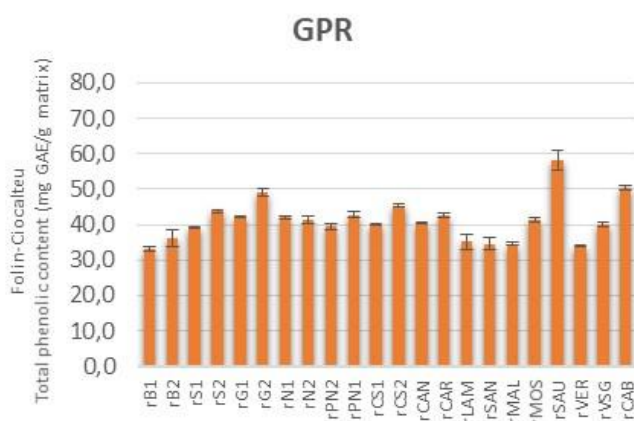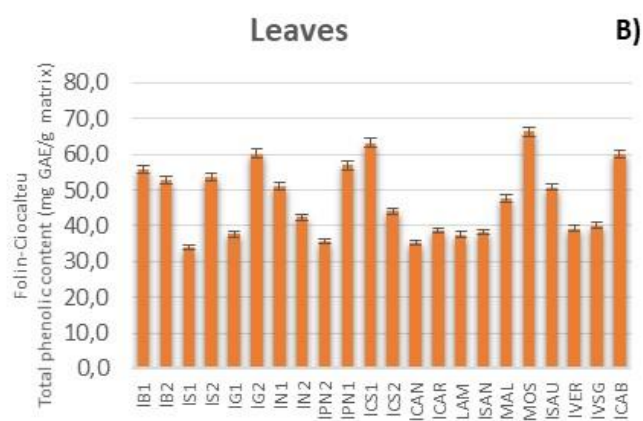

**Figure S3.** Box Plots (A) and histograms (B) relative to the Folin–Ciocalteu Assay. Total phenols content is expressed as mg GAE/g matrix for both the GPRs and leaves extracts.

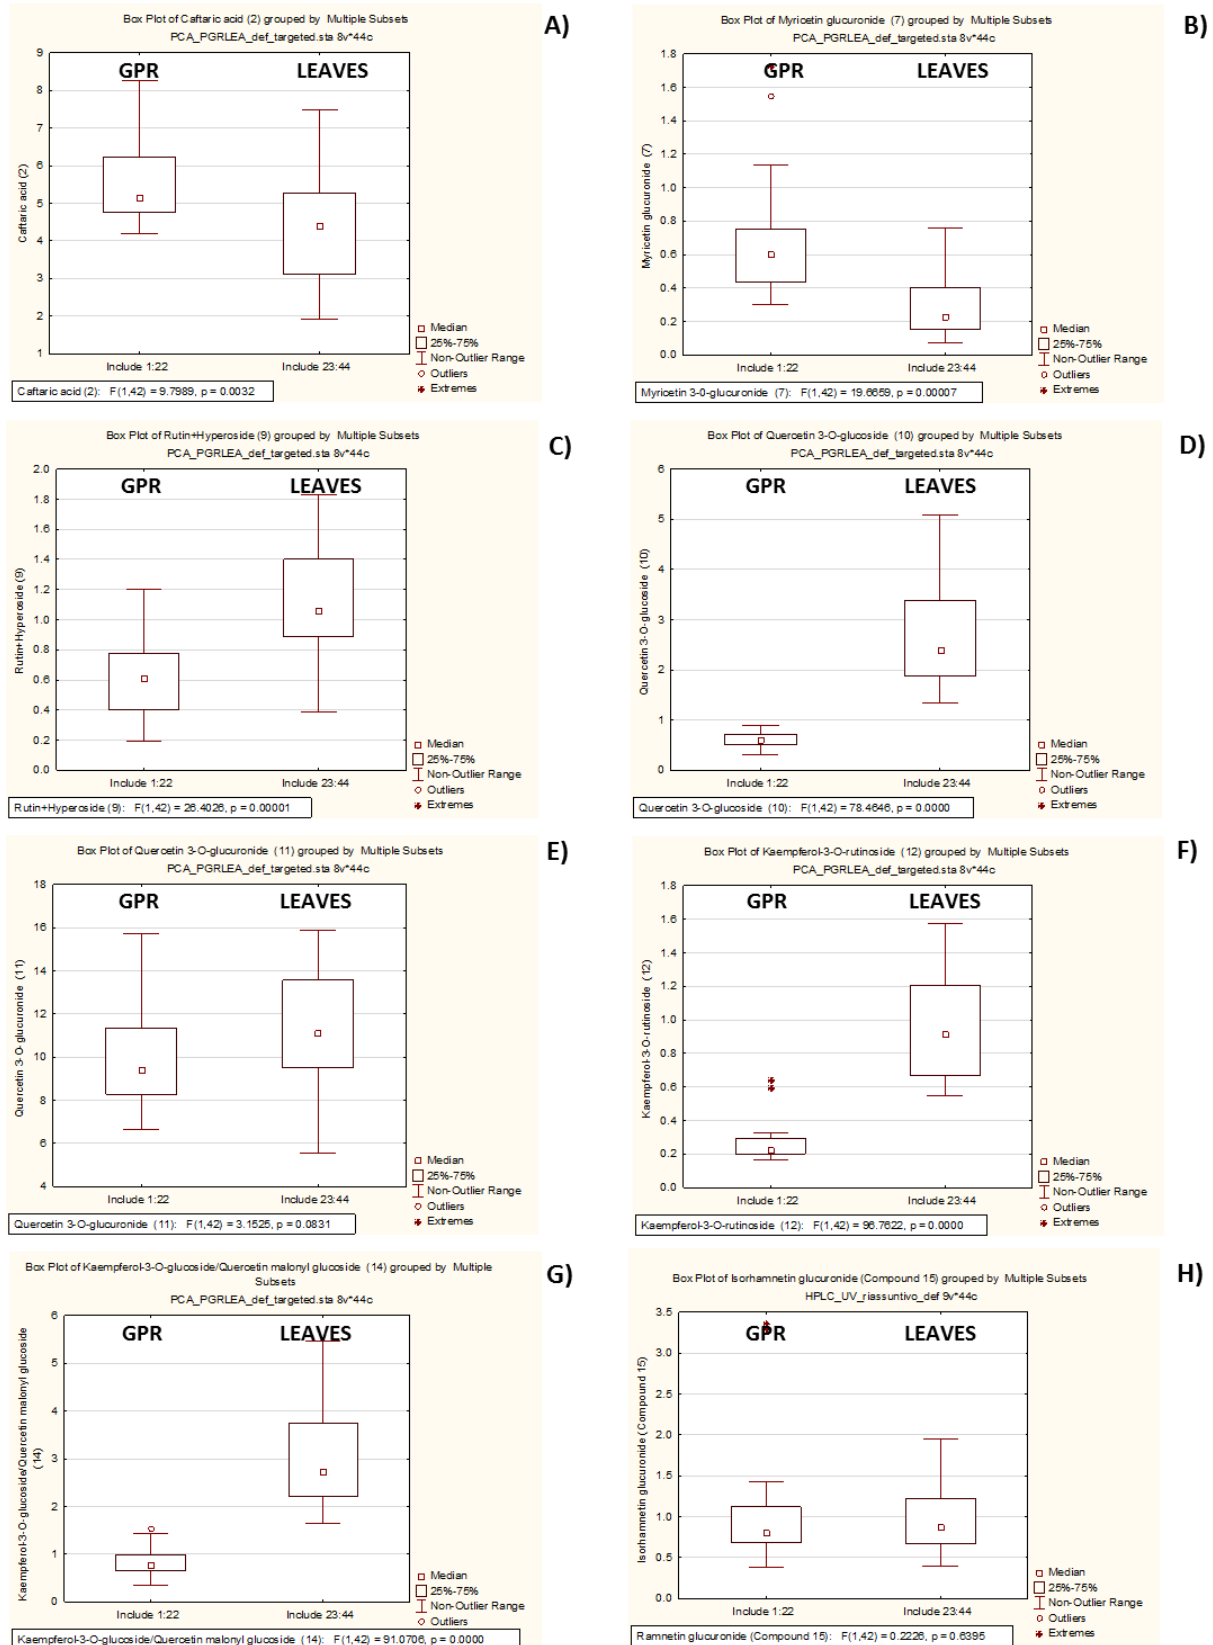

**Figure S4.** – Box Plots relative to the HPLC-PDA quantitative results on the main components of grapevine GPRs and leaves: A) caffeic acid, B) myricetin glucuronide, C) rutin and hyperoside, D) quercetin 3-O-glucoside, E) quercetin 3-O-glucuronide, F) kaempferol-3-O-rutinoside, G) kaempferol-3-O-glucoside and quercetin malonyl hexoside and H) isorhamnetin glucuronide.

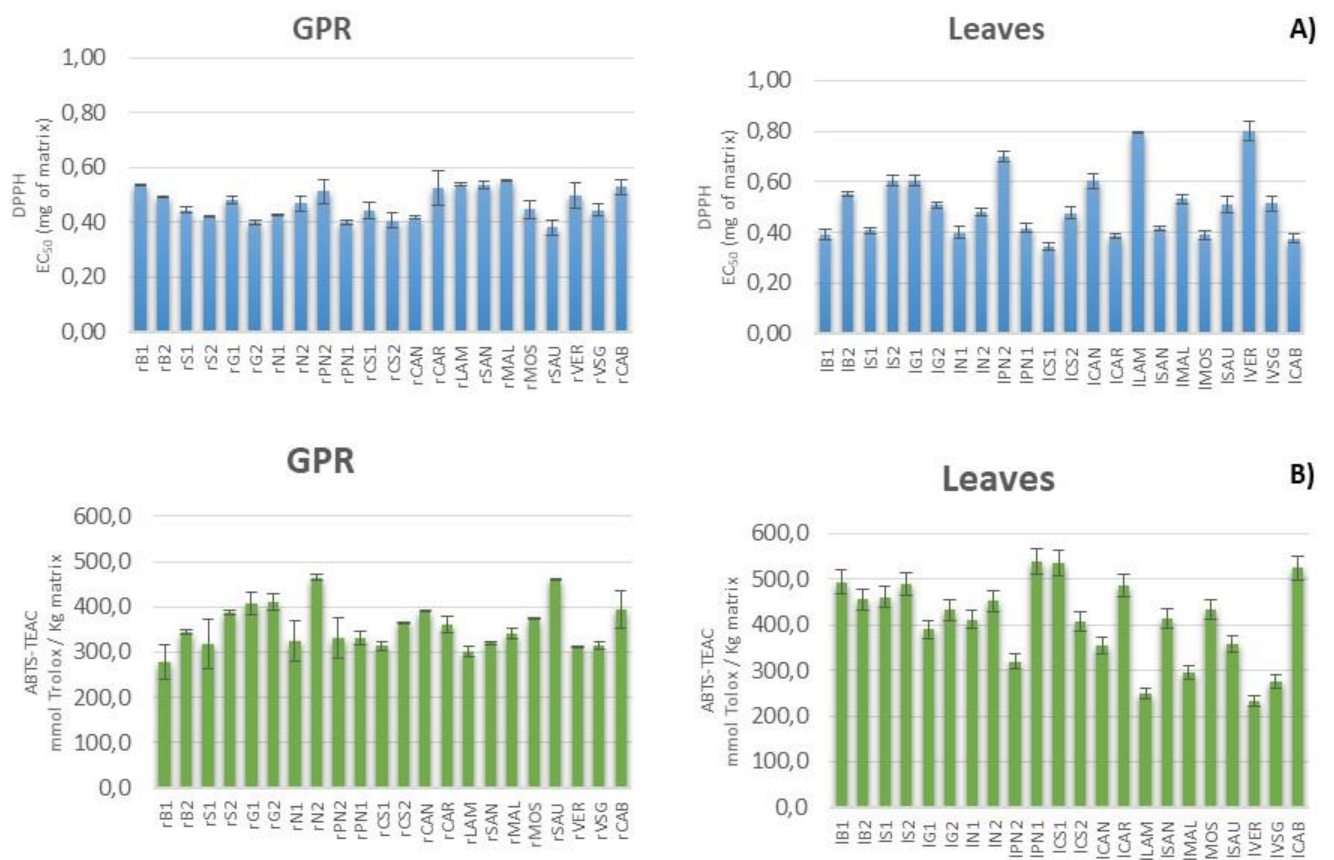

**Figure S5.** –Histograms relative to the *in vitro* colorimetric antioxidant assays for all GPRs and leaves extracts: EC<sub>50</sub> (mg matrix) by DPPH Assay (A) and TEAC by ABTS Assay expressed as mmol Trolox/kg matrix (B).

**Table S1.** – Variables, levels and the design matrices evaluated in the two experimental design.

| INDEPENDENT VARIABLE        |                                  | CODED VARIABLE | LEVELS     |     |      |     |            |
|-----------------------------|----------------------------------|----------------|------------|-----|------|-----|------------|
|                             |                                  |                | - $\alpha$ | -1  | 0    | +1  | + $\alpha$ |
| Box, Hunter & Hunter Design | Water in the solvent mixture (%) | $x_1$          |            | 0   | 25   | 50  |            |
|                             | Extraction time (min)            | $x_2$          |            | 10  | 20   | 30  |            |
|                             | Amount of matrix (mg)            | $x_3$          |            | 100 | 250  | 500 |            |
|                             | Volume of solvent (ml)           | $x_4$          |            | 5   | 22.5 | 50  |            |
| Central Composite Design    | Amount of matrix(mg)             | $x_3$          | 138        | 200 | 350  | 500 | 562        |
|                             | Volume of solvent(ml)            | $x_4$          | 13.8       | 20  | 35   | 50  | 56.2       |

  

| Box, Hunter & Hunter Design |           |       |       |       | Central Composite Design |            |            |
|-----------------------------|-----------|-------|-------|-------|--------------------------|------------|------------|
| Run                         | Variables |       |       |       | Run                      | Variables  |            |
|                             | $x_1$     | $x_2$ | $x_3$ | $x_4$ |                          | $x_3$      | $x_4$      |
| 1                           | -1        | -1    | -1    | -1    | 1                        | -1         | -1         |
| 2                           | 1         | -1    | -1    | 1     | 2                        | -1         | 1          |
| 3                           | -1        | 1     | -1    | 1     | 3                        | 1          | -1         |
| 4                           | 1         | 1     | -1    | -1    | 4                        | 1          | 1          |
| 5                           | -1        | -1    | 1     | 1     | 5                        | - $\alpha$ | 0          |
| 6                           | 1         | -1    | 1     | -1    | 6                        | + $\alpha$ | 0          |
| 7                           | -1        | 1     | 1     | -1    | 7                        | 0          | - $\alpha$ |
| 8                           | 1         | 1     | 1     | 1     | 8                        | 0          | + $\alpha$ |
| 9                           | 0         | 0     | 0     | 0     | 9                        | 0          | 0          |
| 10                          | 0         | 0     | 0     | 0     | 10                       | 0          | 0          |
| 11                          | 0         | 0     | 0     | 0     | 11                       | 0          | 0          |



**Table S2.** – Pearson’s correlation matrix between HPLC-DAD quantitation results (in terms of sum of the concentrations of the main phenolics) and *in-vitro* colorimetric antioxidant assays results.

**Correlation matrix (Pearson (n-1))**

| Variable                | Folin          | ABTS           | EC <sub>50</sub><br>(DPPH) | HPLC           |
|-------------------------|----------------|----------------|----------------------------|----------------|
| Folin                   | <b>1</b>       | <b>0.6526</b>  | <b>-0.4054</b>             | <b>0.5612</b>  |
| ABTS                    | <b>0.6526</b>  | <b>1</b>       | <b>-0.5701</b>             | <b>0.6696</b>  |
| EC <sub>50</sub> (DPPH) | <b>-0.4054</b> | <b>-0.5701</b> | <b>1</b>                   | <b>-0.3257</b> |
| HPLC                    | <b>0.5612</b>  | <b>0.6696</b>  | <b>-0.3257</b>             | <b>1</b>       |

Values in bold type differ from 0 at a significance level  $\alpha=0.05$

**Table S3.** –List of the analyzed samples with their acronyms and sampling year.

| <i>Cultivar</i>           | <i>Code</i> | <i>Sampling year</i> | <i>Cultivar</i>           | <i>Code</i> | <i>Sampling year</i> |
|---------------------------|-------------|----------------------|---------------------------|-------------|----------------------|
| <b>Nebbiolo</b>           | N1 – N2     | 2016                 | <b>Cabernet Franc</b>     | CAB         | 2017                 |
| <b>Barbera</b>            | B1 – B2     | 2016                 | <b>Canaiolo Nero</b>      | CAN         | 2017                 |
| <b>Sirah</b>              | S1 – S2     | 2016                 | <b>Carignano</b>          | CAR         | 2017                 |
| <b>Grenache</b>           | G1 – G2     | 2016                 | <b>Lambrusco Salamino</b> | LAM         | 2017                 |
| <b>Pinot Nero</b>         | PN1 – PN2   | 2016                 | <b>Sangiovese</b>         | SAN         | 2017                 |
| <b>Cabernet Sauvignon</b> | CS1 – CS2   | 2016                 | <b>Malvasia Bianca</b>    | MAL         | 2017                 |
| <b>Moscato Bianco</b>     | MOS         | 2017                 | <b>Verdicchio</b>         | VER         | 2017                 |
| <b>Sauvignon Blanc</b>    | SAU         | 2017                 | <b>Vernaccia</b>          | VSG         | 2017                 |

**Table S4.** Wavelengths, calibration ranges, equations of the curves and linearity of the target compounds used for quantification.

| <i>Compound</i>                  | <i><math>\lambda</math> max (nm)</i> | <i>Linearity range (mg/l)</i> | <i>R<sup>2</sup></i> | <i>Calibration curve equation</i> |
|----------------------------------|--------------------------------------|-------------------------------|----------------------|-----------------------------------|
| <i>Caftaric acid</i>             | 325                                  | 100-1000                      | 0.9994               | $y=21869x-260461$                 |
| <i>Quercetin 3-O-glucuronide</i> | 350                                  | 100-1000                      | 0.9992               | $y=14009x-235766$                 |
| <i>Rutin</i>                     | 350                                  | 5-250                         | 0.9972               | $y=13724x-5740.1$                 |
| <i>Quercetin 3-O-glucoside</i>   | 350                                  | 5-250                         | 0.9979               | $y=16561x-9313.8$                 |
| <i>Kaempferol 3-O-glucoside</i>  | 350                                  | 5-250                         | 0.9979               | $y=3864x-3225.3$                  |
